# Supplementary material for: NLRP6 Induces Lung Injury and Inflammation Early in Brucella and Influenza Coinfection
Source: MDPI journal article supplement (doi:10.3390/jpm12122063), 2022-12-14
Supplement: s1 [file s1]

## *Supplementary Material*

KEY RESOURCES TABLE

| REAGENT or RESOURCE                                         | SOURCE        | IDENTIFIER      |
|-------------------------------------------------------------|---------------|-----------------|
| <b>Bacterial and virus strains</b>                          |               |                 |
| Influenza A/PR/8/1934 (H1N1)                                | The paper     | N/A             |
| Brucella <i>Suis</i> strain S2                              | AOLONG        | Cat#CVCC70502   |
| <b>Chemicals, peptides, and recombinant proteins</b>        |               |                 |
| TPCK-treated trypsin                                        | Sigma         | Cat#4370285     |
| BBL™ Trypticase™ Soy Agar                                   | BD            | Cat#211043      |
| BBL™ Trypticase™ Soy Broth                                  | BD            | Cat#257107      |
| Brucella selective supplement                               | CBMORE        | Cat#CS1901      |
| Brucella Medium Base                                        | CBMORE        | Cat#CB001138    |
| RNAprep Pure Tissue Kit                                     | Tiagen        | Cat#DP431       |
| First-strand cDNA Synthesis Supermix                        | Transcript    | Cat#AT301       |
| PowerUp™ SYBR™ Green Master Mix                             | Thermo Fisher | Cat#A25741      |
| BCA Protein Assay Kit                                       | Genstar       | Cat#E162-05     |
| Direct-load Color Prestained Protein Marker                 | Genstar       | Cat#M221-10     |
| HRP-conjugated GAPDH Monoclonal antibody                    | Proteintech   | Cat#HRP-60004   |
| GSDMD Polyclonal antibody                                   | Proteintech   | Cat#20770-1-AP  |
| NLRP6 Polyclonal antibody                                   | Immunoway     | Cat#YN4671      |
| pre-cast polyacrylamide BisTris gel                         | Solarbio      | N/A             |
| Goat Anti-Rabbit IgG H&L (HRP)                              | Abcam         | Cat#ab6721      |
| Mouse TNF- $\alpha$ (Tumor Necrosis Factor Alpha) ELISA Kit | elabscience   | Cat#E-EL-M3063  |
| Mouse IL-18(Interleukin 18) ELISA Kit                       | elabscience   | Cat#E-EL-M0730c |
| Mouse IL-1 $\beta$ (Interleukin 1 Beta) ELISA Kit           | elabscience   | Cat#E-EL-M0037c |
| <b>Experimental models: Cell lines</b>                      |               |                 |
| Canine: MDCK (NBL-2) cells                                  | ATCC          | Cat#CCL-34      |
| <b>Experimental models: Organisms/strains</b>               |               |                 |
| Mouse: C57BL/6N                                             | This paper    | N/A             |
| Mouse: NLRP6 <sup>-/-</sup> C57BL/6N                        | This paper    | N/A             |
| <b>Oligonucleotides</b>                                     |               |                 |
| Primers                                                     | Table S1      | N/A             |

| Software and algorithms |           |                                                                                                                     |
|-------------------------|-----------|---------------------------------------------------------------------------------------------------------------------|
| SPSS 22                 | IBM       | <a href="https://www.ibm.com/cn">https://www.ibm.com/cn</a>                                                         |
| GraphPad 9.0            | OriginLab | <a href="https://www.graphpad.com/scientific-software/prism">https://www.graphpad.com/scientific-software/prism</a> |

Table S1: The primers used for q-PCR.

| Gene         | Forward primer                 | Reverse primer                  |
|--------------|--------------------------------|---------------------------------|
| Influenza M1 | 5'-aagaccaatcctgtcacctctg-3'   | 5'-caaaacgtctacgctgcagtcc-3'    |
| GAPDH        | 5'-aggtcgggtgtgaacggatttg-3'   | 5'-ttagaccatgtagttgaggta-3'     |
| NLRP6        | 5'-agtttagccagaaagga-3'        | 5'-ccagtgtagccataagcag-3'       |
| GSDMD        | 5'-gaattcatgccatcggcctttgag-3' | 5'-ggatccatctgacaggagactgagc-3' |
| IL-1 $\beta$ | 5'-gccagtgaatgatggcttatt-3'    | 5'-aggagcacttcattctgttagg-3'    |
| IL-18        | 5'-actgtacaaccgcagtaatacgc-3'  | 5'-agtgaacattacagatttatccc-3'   |
